# Supplementary material
Source: MDPI journal article supplement (https://www.mdpi.com/2227-9040/9/12/349)
Supplement: s1 [file s1]

## Supplementary material

### Fluorescent AgNCs formed on bifunctional DNA template for potassium ion detection

Patrycja Filipczuk<sup>1</sup>, Angelika Świtalska<sup>1</sup>, Joanna Kosman<sup>1</sup>, Grzegorz Nowaczyk<sup>2</sup> and Anna Dembska<sup>1,\*</sup>

<sup>1</sup>Faculty of Chemistry, Adam Mickiewicz University, Uniwersytetu Poznańskiego 8, 61-614 Poznań, Poland;

<sup>2</sup>NanoBioMedical Centre, Adam Mickiewicz University, Wszechnicy Piastowskiej 3, 61-614 Poznań, Poland;

\*Correspondence: aniojka@amu.edu.pl; Tel.: +48-61-829-1771

| No.        | Title                                                                                                                                                                                            | Page |
|------------|--------------------------------------------------------------------------------------------------------------------------------------------------------------------------------------------------|------|
| Figure S1  | Absorption spectra of C12-AgNCs with cytosine to Ag <sup>+</sup> ratio 1:0.5 (a), 1:1 (b) and 1:2 (c) (Ag <sup>+</sup> /C). Changes in time of absorbance value at $\lambda=440$ nm (d).         | 2    |
| Figure S2  | Absorption spectra of Tel22C12-AgNCs with cytosine to Ag <sup>+</sup> ratio 1:1 (Ag <sup>+</sup> /C) (a) or cytosine and guanine to Ag <sup>+</sup> ratio 1:1 (Ag <sup>+</sup> /CG) (b).         | 3    |
| Figure S3  | Absorption spectra of TBAC12-AgNCs with cytosine to Ag <sup>+</sup> ratio 1:1 (Ag <sup>+</sup> /C) (a) or cytosine and guanine to Ag <sup>+</sup> ratio 1:1 (Ag <sup>+</sup> /CG) (b).           | 3    |
| Figure S4  | Circular dichroism spectra of Tel22C12-AgNCs with cytosine to Ag <sup>+</sup> ratio 1:1 (Ag <sup>+</sup> /C) (a) or cytosine and guanine to Ag <sup>+</sup> ratio 1:1 (Ag <sup>+</sup> /CG) (b). | 4    |
| Figure S5  | Circular dichroism spectra of TBAC12-AgNCs with cytosine to Ag <sup>+</sup> ratio 1:1 (Ag <sup>+</sup> /C) (a) or cytosine and guanine to Ag <sup>+</sup> ratio 1:1 (Ag <sup>+</sup> /CG) (b).   | 4    |
| Figure S6  | Transmission electron microscopy (TEM) images of the nanoclusters C12-AgNCs (A,B) and Tel22C12-AgNCs (C,D). Scale bar 10 nm (A,C), 2 nm (B,D).                                                   | 5    |
| Figure S7  | UV melting profiles of TBAC12 and TBAC12-AgNCs (2 $\mu$ M) in 10 mM Tris-acetate buffer (pH= 7.5) containing 100 mM NaCl or 100 mM KCl; monitored at 260 nm (a) or 295 nm (b).                   | 6    |
| Figure S8  | Excitation spectra at $\lambda_{em}=630$ nm (a) and emission spectra at $\lambda_{ex}=580$ nm (b) of C12-AgNCs with cytosine to Ag <sup>+</sup> ratio 1:1 (Ag <sup>+</sup> /C).                  | 6    |
| Figure S9  | Excitation spectra at $\lambda_{em}=550$ nm (a) and emission spectra at $\lambda_{ex}=470$ nm (b) of Tel22C12-AgNCs with cytosine to Ag <sup>+</sup> ratio 1:1 (Ag <sup>+</sup> /C).             | 7    |
| Figure S10 | Excitation spectra at $\lambda_{em}=620$ nm (a) and emission spectra at $\lambda_{ex}=570$ nm (b) of Tel22C12-AgNCs with cytosine to Ag <sup>+</sup> ratio 1:1 (Ag <sup>+</sup> /C).             | 7    |
| Figure S11 | Excitation spectra at $\lambda_{em}=550$ nm (a) and emission spectra at $\lambda_{ex}=470$ nm (b) of TBAC12-AgNCs with cytosine to Ag <sup>+</sup> ratio 1:1 (Ag <sup>+</sup> /C).               | 8    |
| Figure S12 | Excitation spectra at $\lambda_{em}=610$ nm (a) and emission spectra at $\lambda_{ex}=560$ nm (b) of TBAC12-AgNCs with cytosine to Ag <sup>+</sup> ratio 1:1 (Ag <sup>+</sup> /C).               | 8    |
| Figure S13 | Influence of K <sup>+</sup> ions on red emission spectra of Tel22C12-AgNCs upon addition of KCl or KNO <sub>3</sub> .                                                                            | 9    |
| Figure S14 | Absorption spectra of Tel22C12-AgNCs with cytosine to Ag <sup>+</sup> ratio 1:1 (Ag <sup>+</sup> /C) upon titration with KCl (a) and NaCl (b).                                                   | 9    |
| Figure S15 | Absorption spectra of TBAC12-AgNCs with cytosine to Ag <sup>+</sup> ratio 1:1 (Ag <sup>+</sup> /C) upon titration with KCl (a) and NaCl (b).                                                     | 9    |
| Figure S16 | Circular dichroism spectra of Tel22C12-AgNCs with cytosine to Ag <sup>+</sup> ratio 1:1 (Ag <sup>+</sup> /C) upon titration with KCl (a) and NaCl (b).                                           | 10   |
| Figure S17 | Circular dichroism spectra of TBAC12-AgNCs with cytosine to Ag <sup>+</sup> ratio 1:1 (Ag <sup>+</sup> /C) upon titration with KCl (a) and NaCl (b).                                             | 10   |

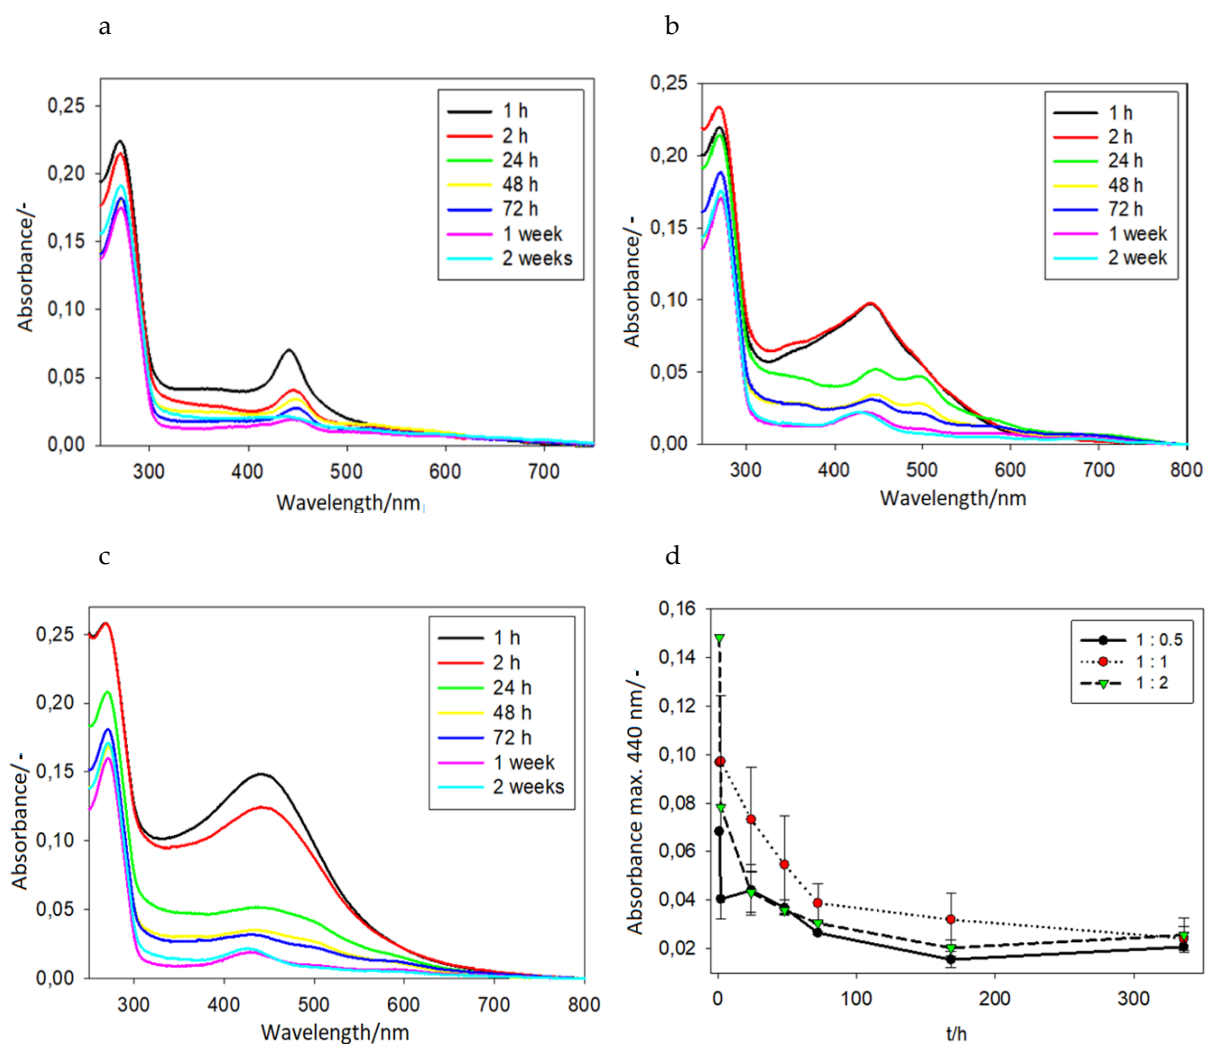

**Figure S1** Absorption spectra of C12-AgNCs with cytosine to  $\text{Ag}^+$  ratio 1:0.5 (a), 1:1 (b) and 1:2 (c) ( $\text{Ag}^+/\text{C}$ ). Changes in time of absorbance value at  $\lambda=440$  nm (d). Conditions: 2  $\mu\text{M}$  probe, 10 mM Tris- $\text{CH}_3\text{COOH}$  (pH=7.5),  $[\text{Ag}^+]=12 \mu\text{M}$ ,  $[\text{BH}_4^-]=12 \mu\text{M}$  (a),  $[\text{Ag}^+]=[\text{BH}_4^-]=24 \mu\text{M}$  (b),  $[\text{Ag}^+]=48 \mu\text{M}$ ,  $[\text{BH}_4^-]=48 \mu\text{M}$  ( $\text{Ag}^+/\text{C}$ ).

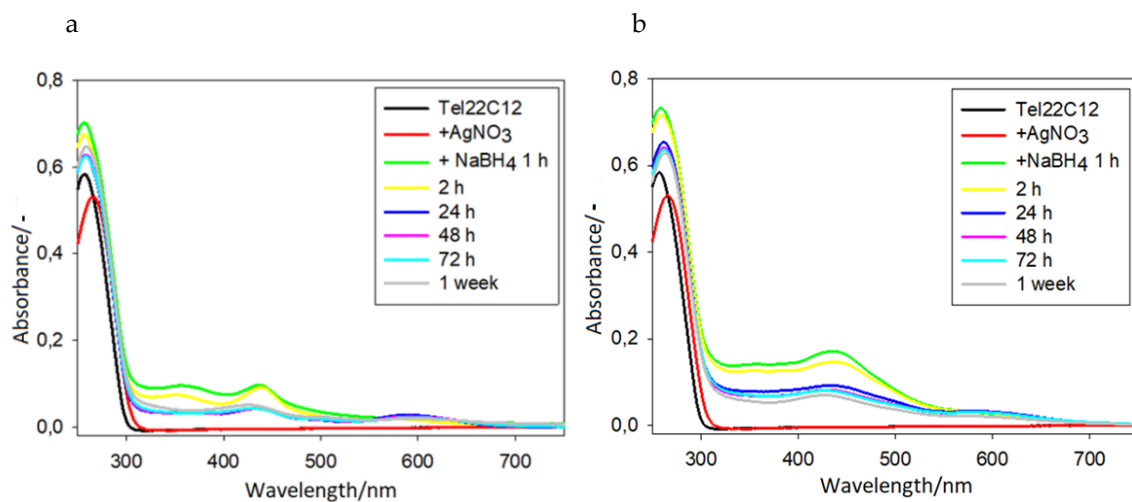

**Figure S2** Absorption spectra of Tel22C12-AgNCs with cytosine to  $\text{Ag}^+$  ratio 1:1 ( $\text{Ag}^+/\text{C}$ ) (a) or cytosine and guanine to  $\text{Ag}^+$  ratio 1:1 ( $\text{Ag}^+/\text{CG}$ ) (b).

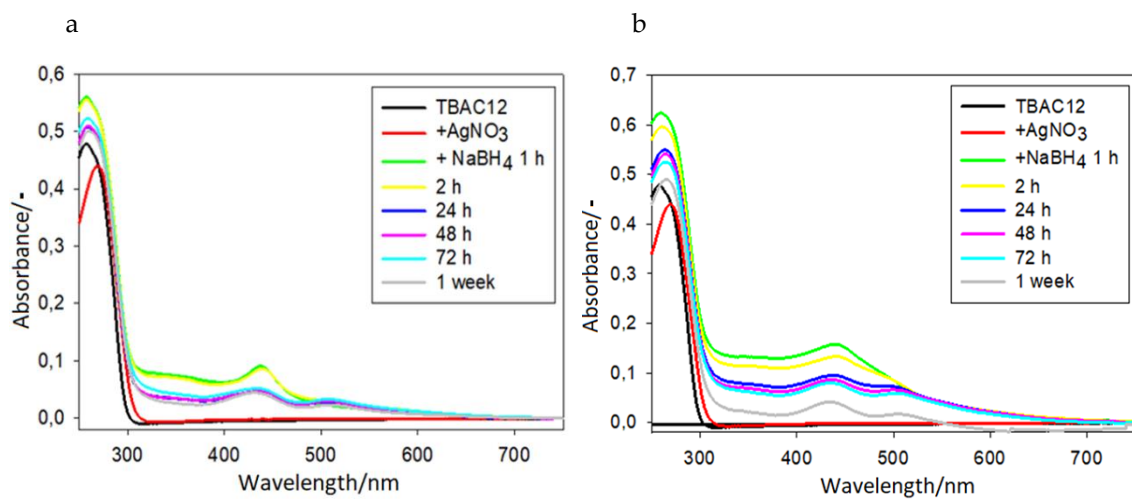

**Figure S3** Absorption spectra of TBAC12-AgNCs with cytosine to  $\text{Ag}^+$  ratio 1:1 ( $\text{Ag}^+/\text{C}$ ) (a) or cytosine and guanine to  $\text{Ag}^+$  ratio 1:1 ( $\text{Ag}^+/\text{CG}$ ) (b).

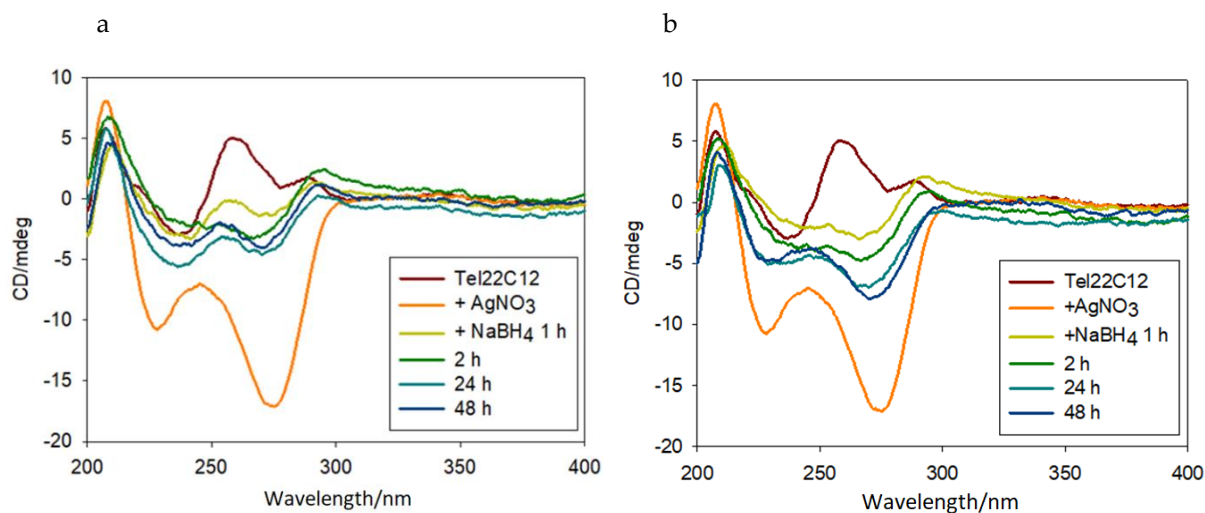

**Figure S4** Circular dichroism spectra of Tel22C12-AgNCs with cytosine to Ag<sup>+</sup> ratio 1:1 (Ag<sup>+</sup>/C) (a) or cytosine and guanine to Ag<sup>+</sup> ratio 1:1 (Ag<sup>+</sup>/CG) (b).

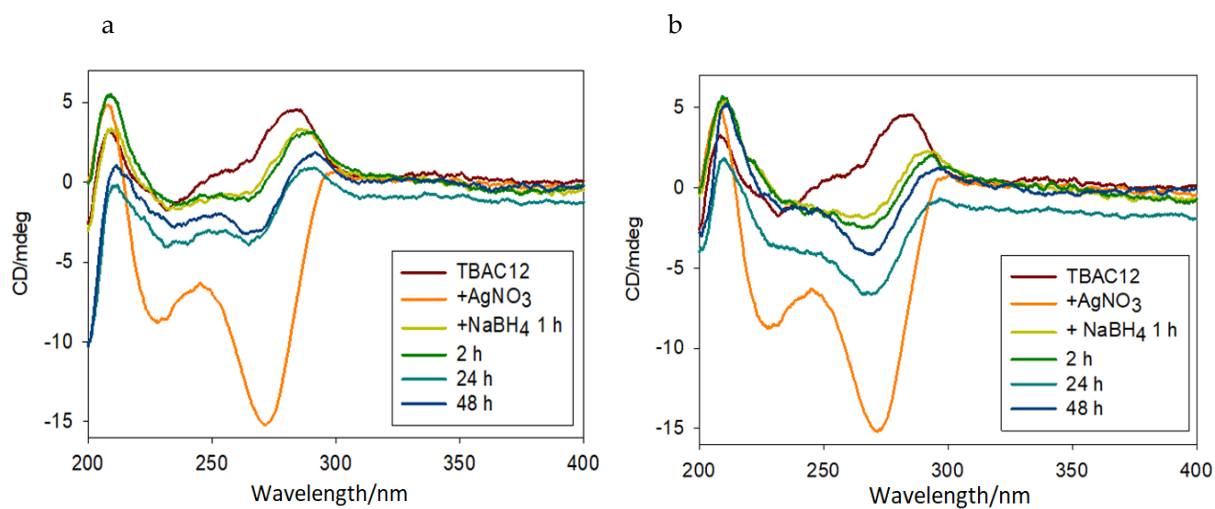

**Figure S5** Circular dichroism spectra of TBAC12-AgNCs with cytosine to Ag<sup>+</sup> ratio 1:1 (Ag<sup>+</sup>/C) (a) or cytosine and guanine to Ag<sup>+</sup> ratio 1:1 (Ag<sup>+</sup>/CG) (b).

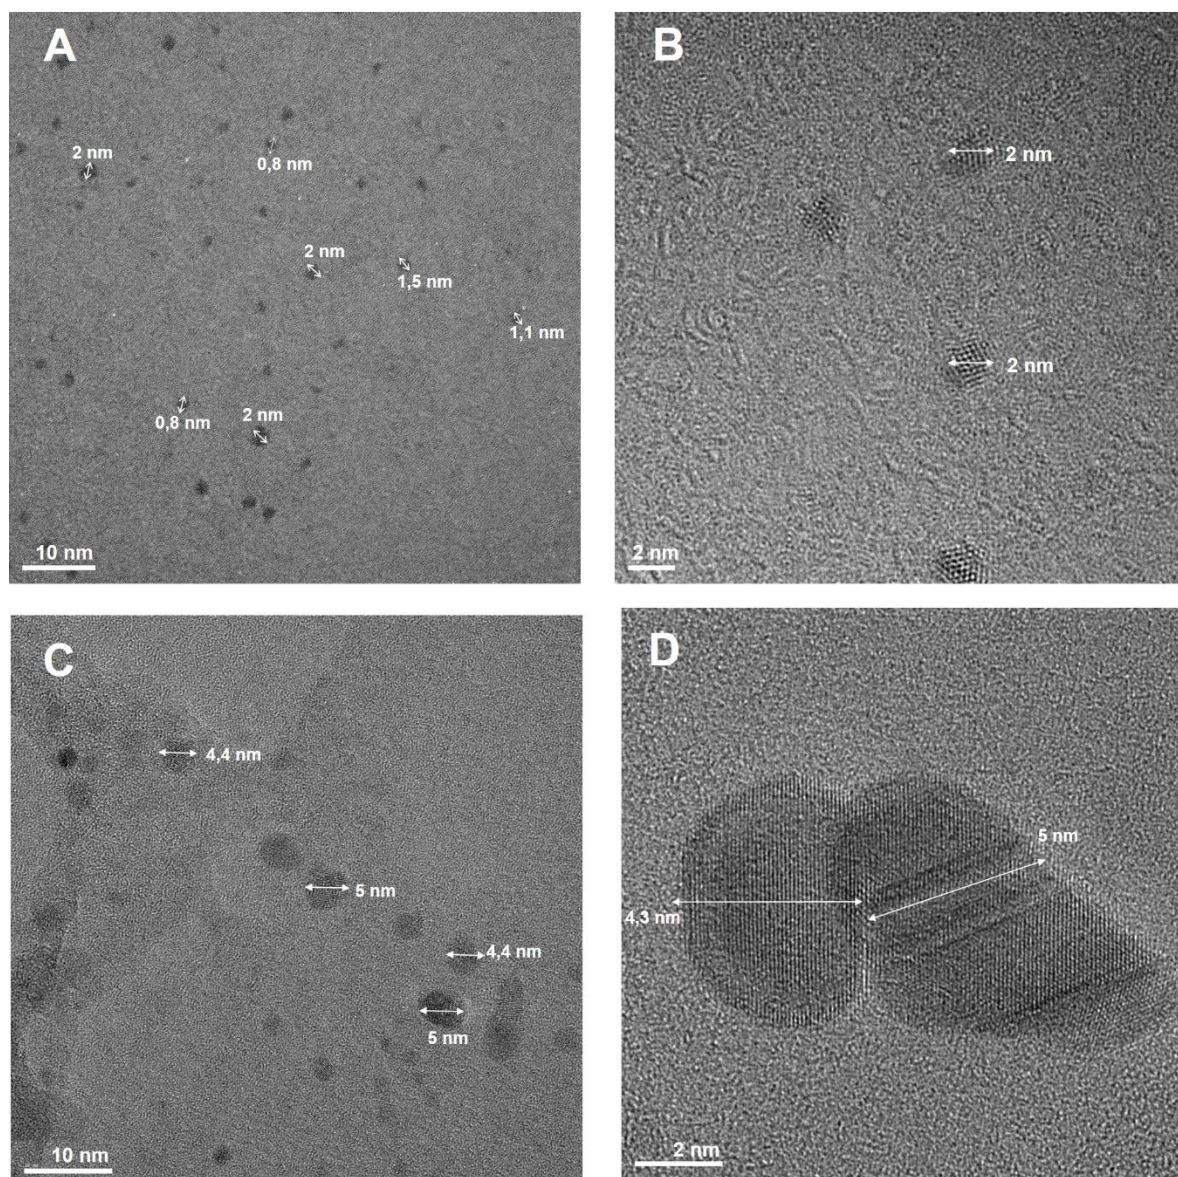

**Figure S6** Transmission electron microscopy (TEM) images of the nanoclusters C12-AgNCs (A,B) and Tel22C12-AgNCs (C,D). Scale bar 10 nm (A,C), 2 nm (B,D).



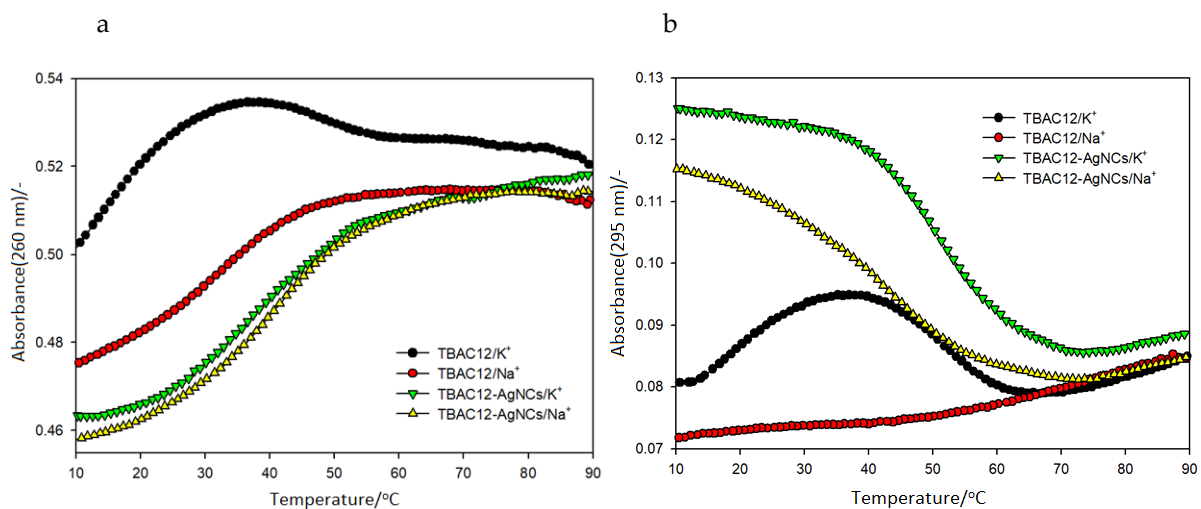

**Figure S7** UV melting profiles of TBAC12 and TBAC12-AgNCs (2  $\mu\text{M}$ ) in 10 mM Tris-acetate buffer (pH=7.5) containing 100 mM NaCl or 100 mM KCl; monitored at 260 nm (a) or 295 nm (b).

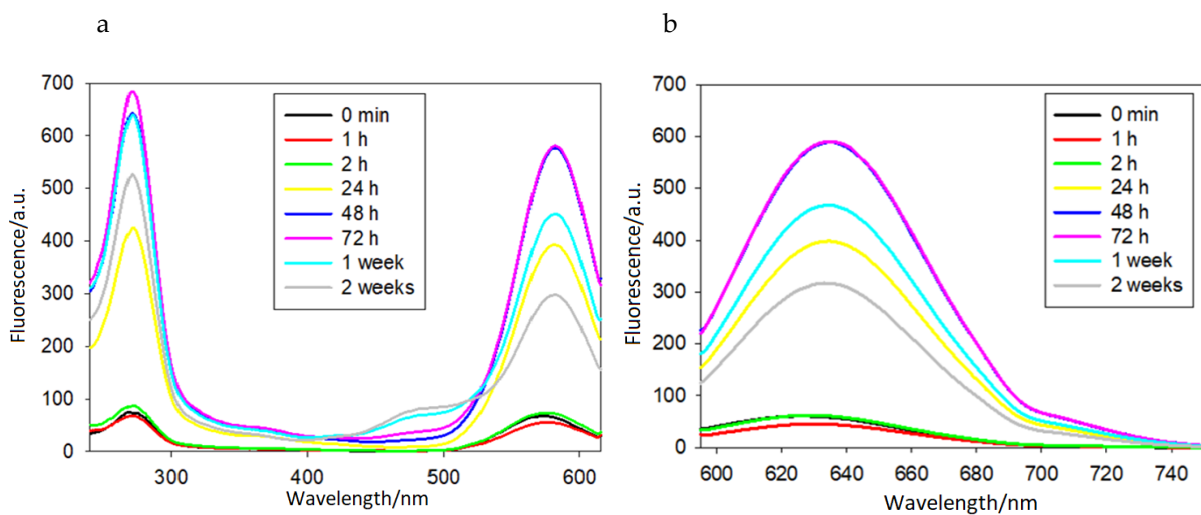

**Figure S8** Excitation spectra at emission wavelength  $\lambda_{\text{em}}=630$  nm (a) and emission spectra at excitation wavelength  $\lambda_{\text{ex}}=580$  nm (b) of C12-AgNCs with cytosine to  $\text{Ag}^+$  ratio 1:1 ( $\text{Ag}^+/\text{C}$ ).

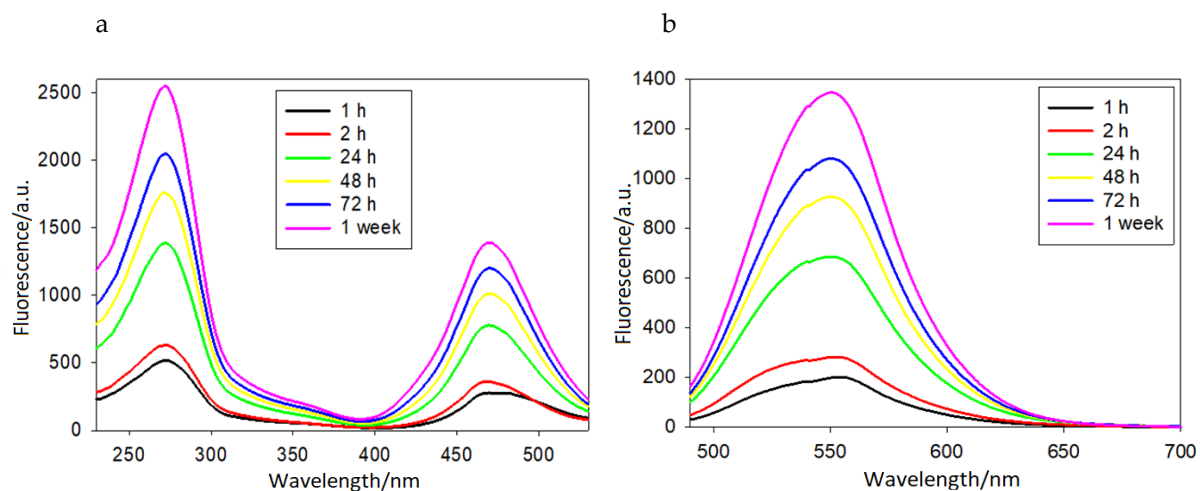

**Figure S9** Excitation spectra at emission wavelength  $\lambda_{\text{em}} = 550 \text{ nm}$  (a) and emission spectra at excitation wavelength  $\lambda_{\text{ex}} = 470 \text{ nm}$  (b) of Tel22C12-AgNCs with cytosine to  $\text{Ag}^+$  ratio 1:1 ( $\text{Ag}^+/\text{C}$ ).

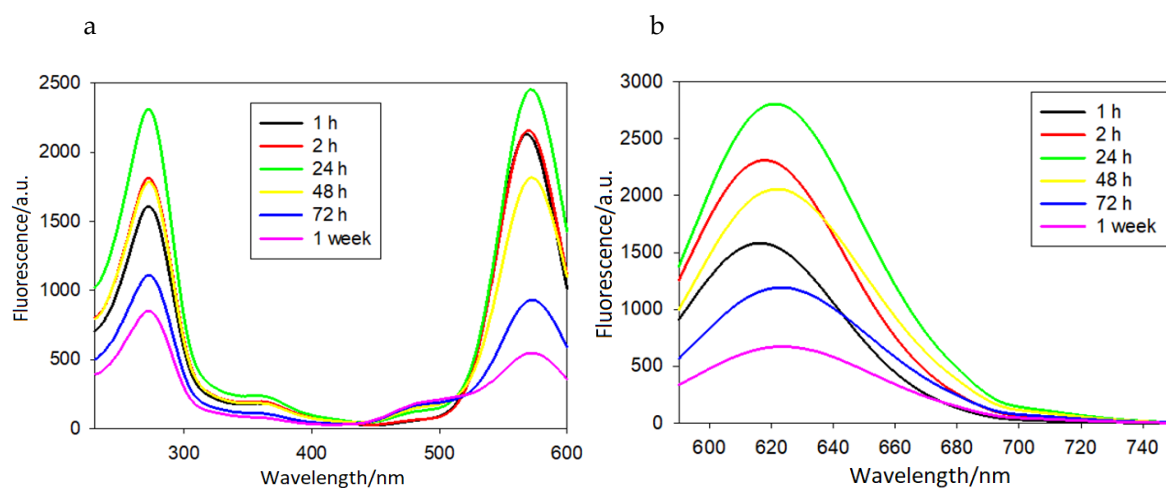

**Figure S10** Excitation spectra at emission wavelength  $\lambda_{\text{em}} = 620 \text{ nm}$  (a) and emission spectra at excitation wavelength  $\lambda_{\text{ex}} = 570 \text{ nm}$  (b) of Tel22C12-AgNCs with cytosine to  $\text{Ag}^+$  ratio 1:1 ( $\text{Ag}^+/\text{C}$ ).

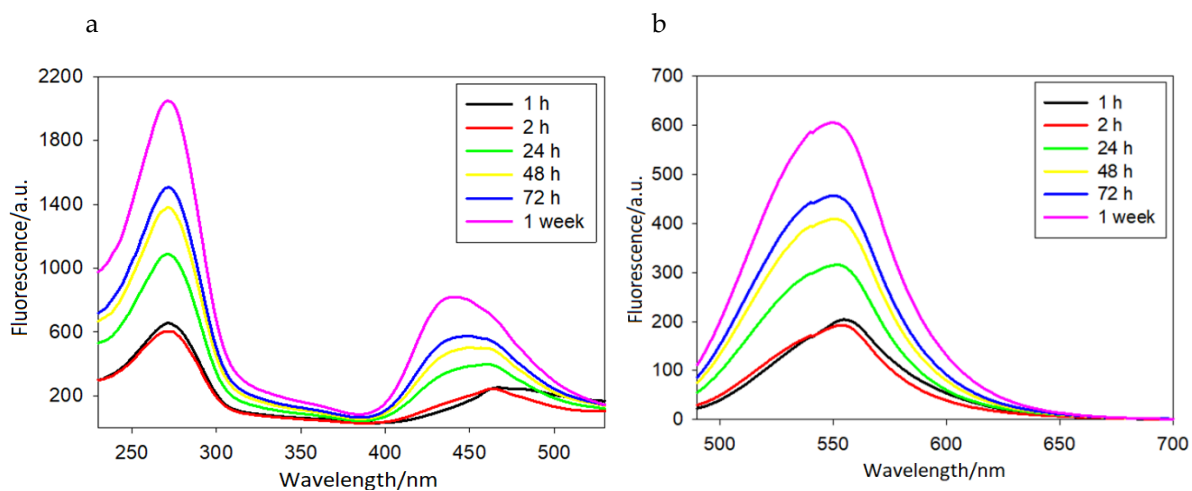

**Figure S11** Excitation spectra at emission wavelength  $\lambda_{em}=550$  nm (a) and emission spectra at excitation wavelength  $\lambda_{ex}=470$  nm (b) of TBAC12-AgNCs with cytosine to  $Ag^+$  ratio 1:1 ( $Ag^+/C$ ).

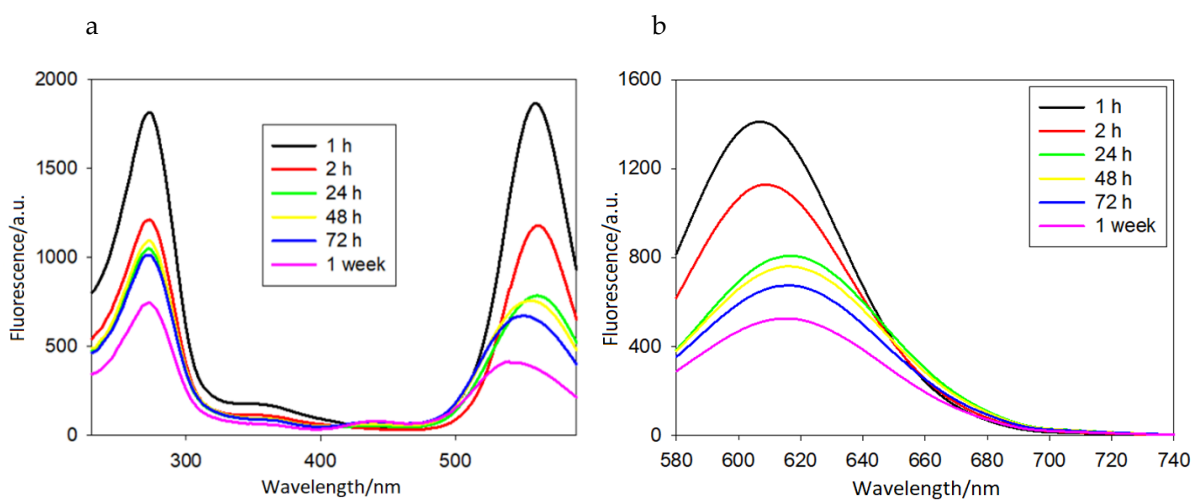

**Figure S12** Excitation spectra at emission wavelength  $\lambda_{em}=610$  nm (a) and emission spectra at excitation wavelength  $\lambda_{ex}=560$  nm (b) of TBAC12-AgNCs with cytosine to  $Ag^+$  ratio 1:1 ( $Ag^+/C$ ).



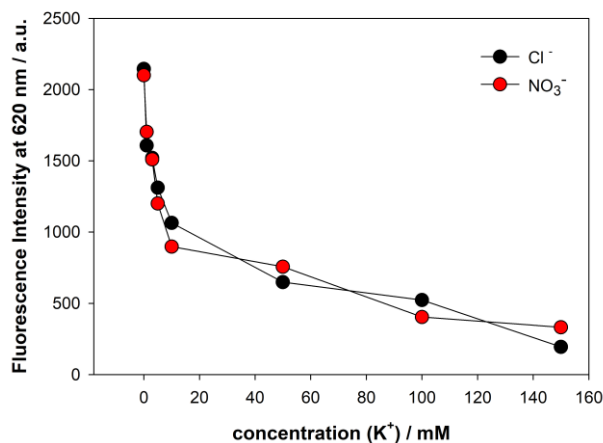

**Figure S13.** Influence of  $K^+$  ions on red emission spectra of Tel22C12-AgNCs upon addition of KCl (black circles) or  $KNO_3$  (red circles).

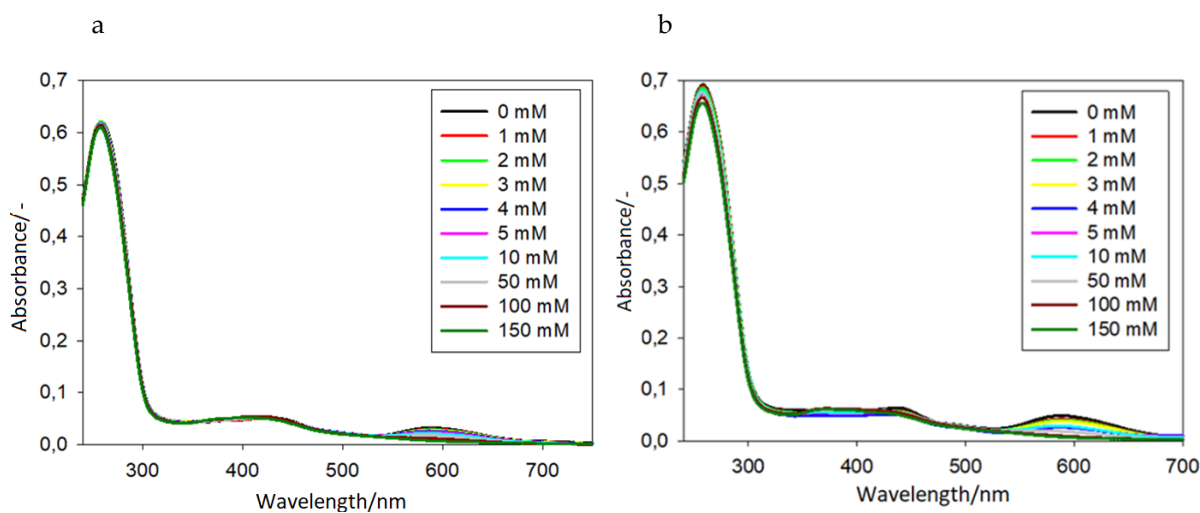

**Figure S14** Absorption spectra of Tel22C12-AgNCs with cytosine to  $Ag^+$  ratio 1:1 ( $Ag^+/C$ ) upon titration with KCl (a) and NaCl (b).

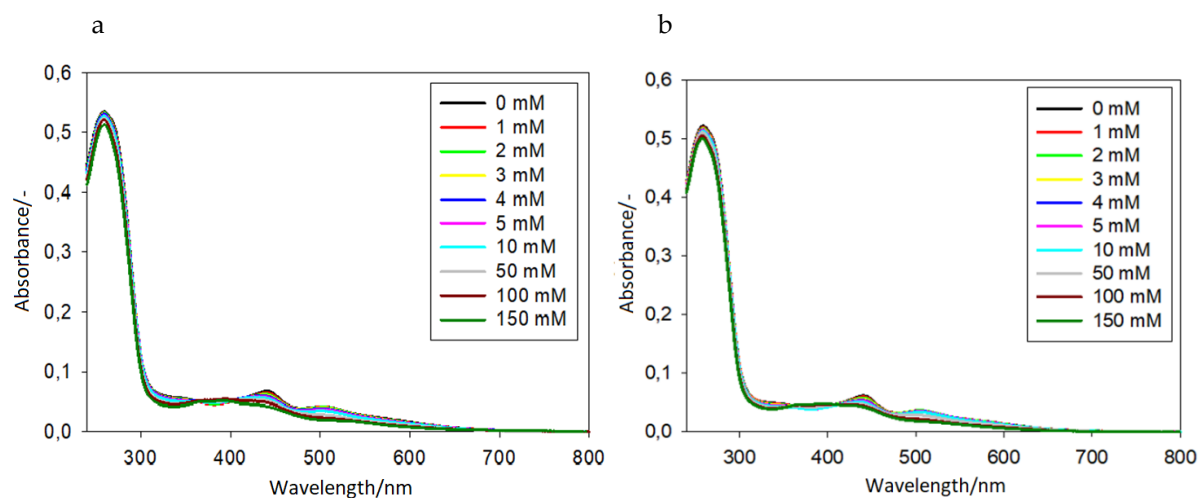

**Figure S15** Absorption spectra of TBAC12-AgNCs with cytosine to  $Ag^+$  ratio 1:1 ( $Ag^+/C$ ) upon titration with KCl (a) and NaCl (b).

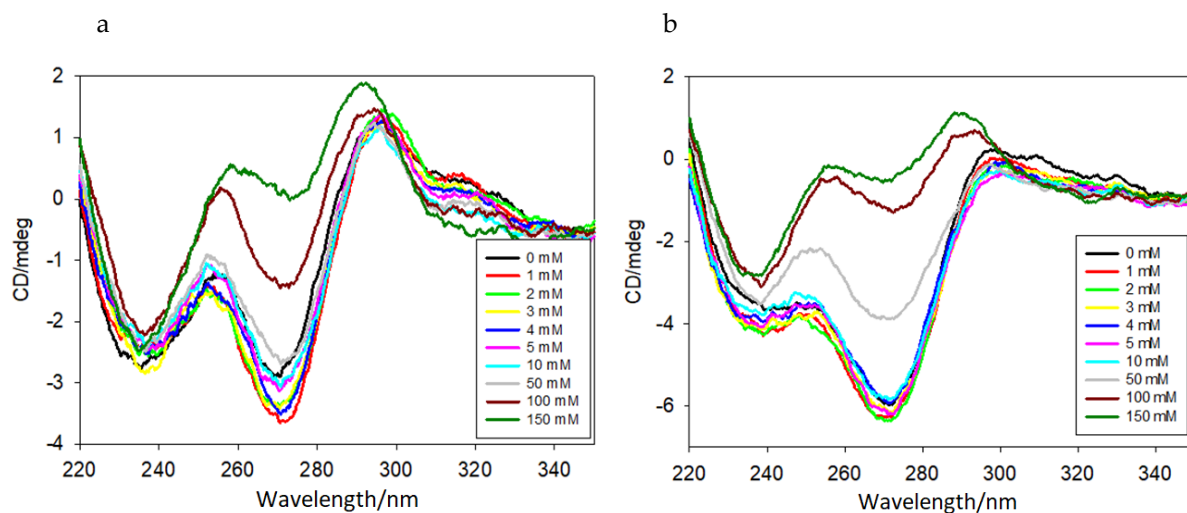

**Figure S16** Circular dichroism spectra of Tel22C12-AgNCs with cytosine to  $\text{Ag}^+$  ratio 1:1 ( $\text{Ag}^+/\text{C}$ ) upon titration with KCl (a) and NaCl (b).

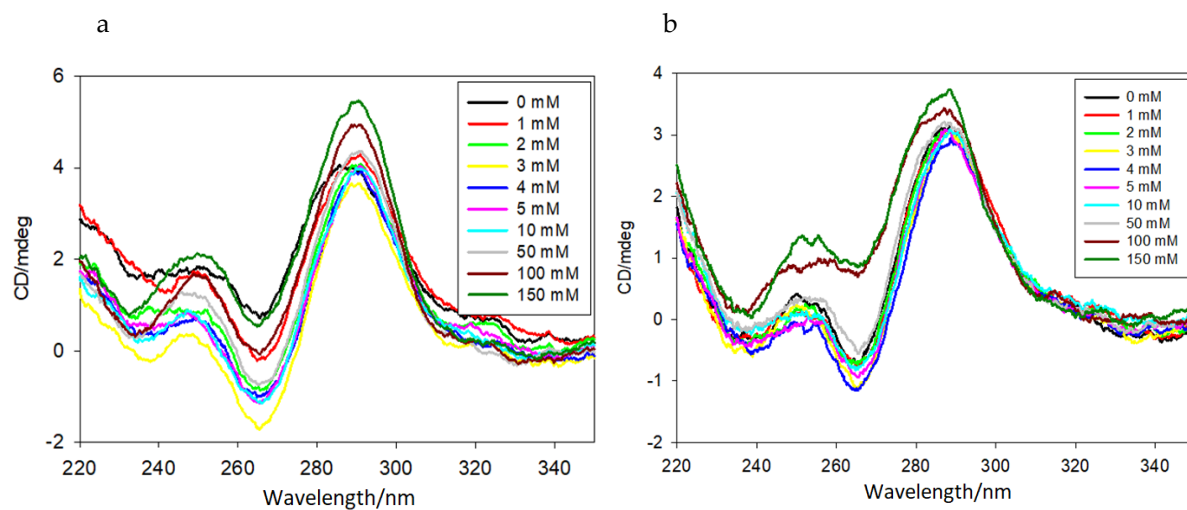

**Figure S17** Circular dichroism spectra of TBAC12-AgNCs with cytosine to  $\text{Ag}^+$  ratio 1:1 ( $\text{Ag}^+/\text{C}$ ) upon titration with KCl (a) and NaCl (b).
